# Supplementary material for: Photocatalytic activity of quantum dot–magnetite nanocomposites to degrade organic dyes in the aqueous phase
Source: Royal Society of Chemistry journal article supplement (doi:10.1039/c3ta01135f), 2013-01-01

# Electronic Supplementary Information

**ESI Fig. 1** HR- TEM images of nanocomposite (A), Cd-based QDs (B) and magnetite-DMSA (C). The scale bar in the inset of HR- TEM images were 20 nm.

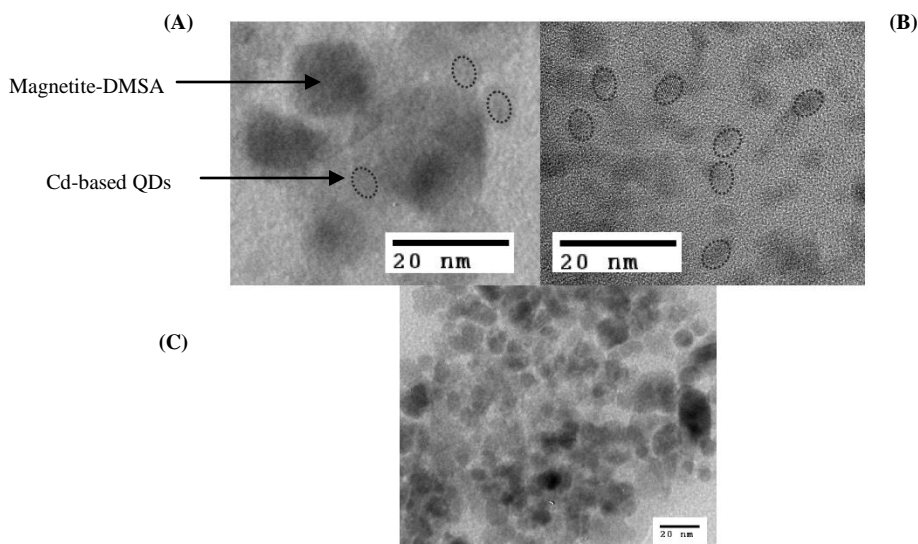

**ESI Fig. 2** Magnetization measurement of nanocomposite and magnetite-DMSA.

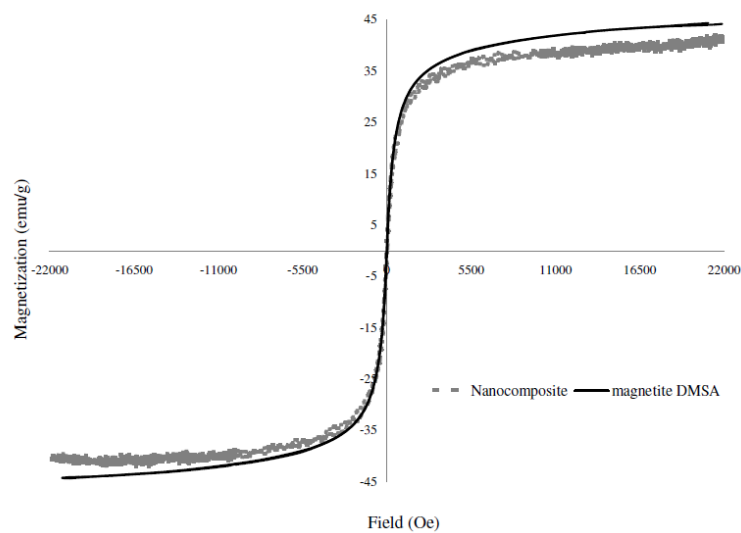

**ESI Fig. 3** Absorption spectra of titanium dioxide (aerioxide P25) (A) and titanium dioxide (anatase) (B).

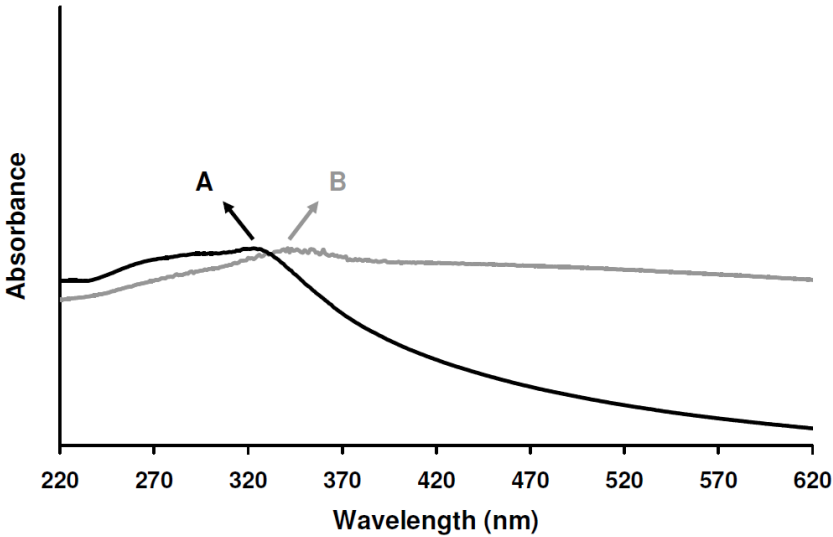

Supplement: c3ta01135f.pdf [file c3ta01135f.pdf]
